# Supplementary material
Source: MDPI journal article supplement (https://www.mdpi.com/2073-4352/12/3/419)
Supplement: s1 [file s1]

**Supplementary information** present SEM images in SE mode of  $\text{CaV}_{1-x}\text{Mo}_x\text{O}_{3-\delta}$  samples, as well as real-resolution HRTEM images supported by fast Fourier transform (FFT) diffraction patterns and filtered images of the analyzed areas.

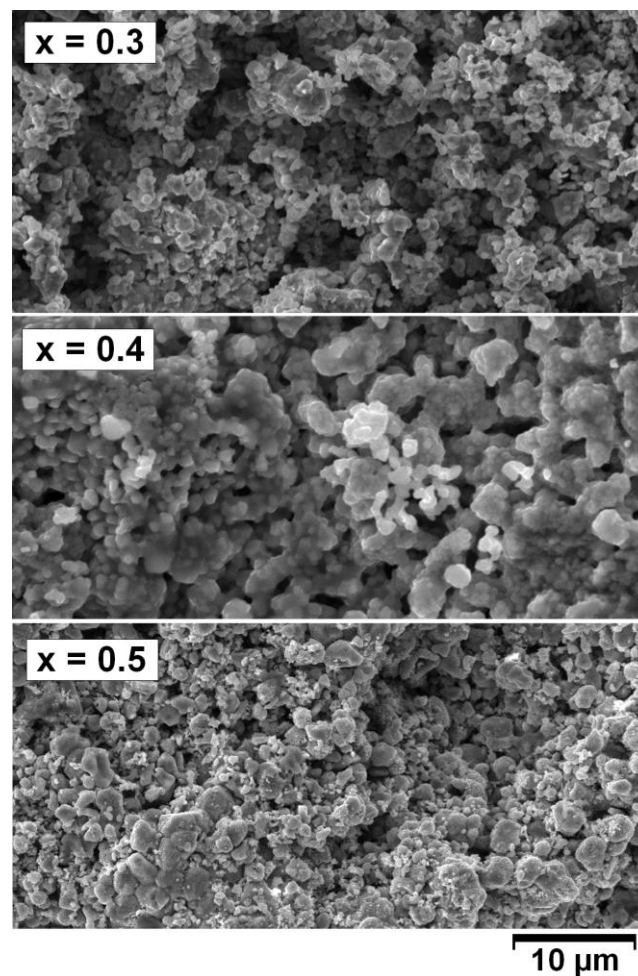

**Figure S1.** SEM-images (SE mode) of the surface of sintered  $\text{CaV}_{1-x}\text{Mo}_x\text{O}_{3-\delta}$  ( $0.3 \leq x \leq 0.5$ ) ceramic samples.

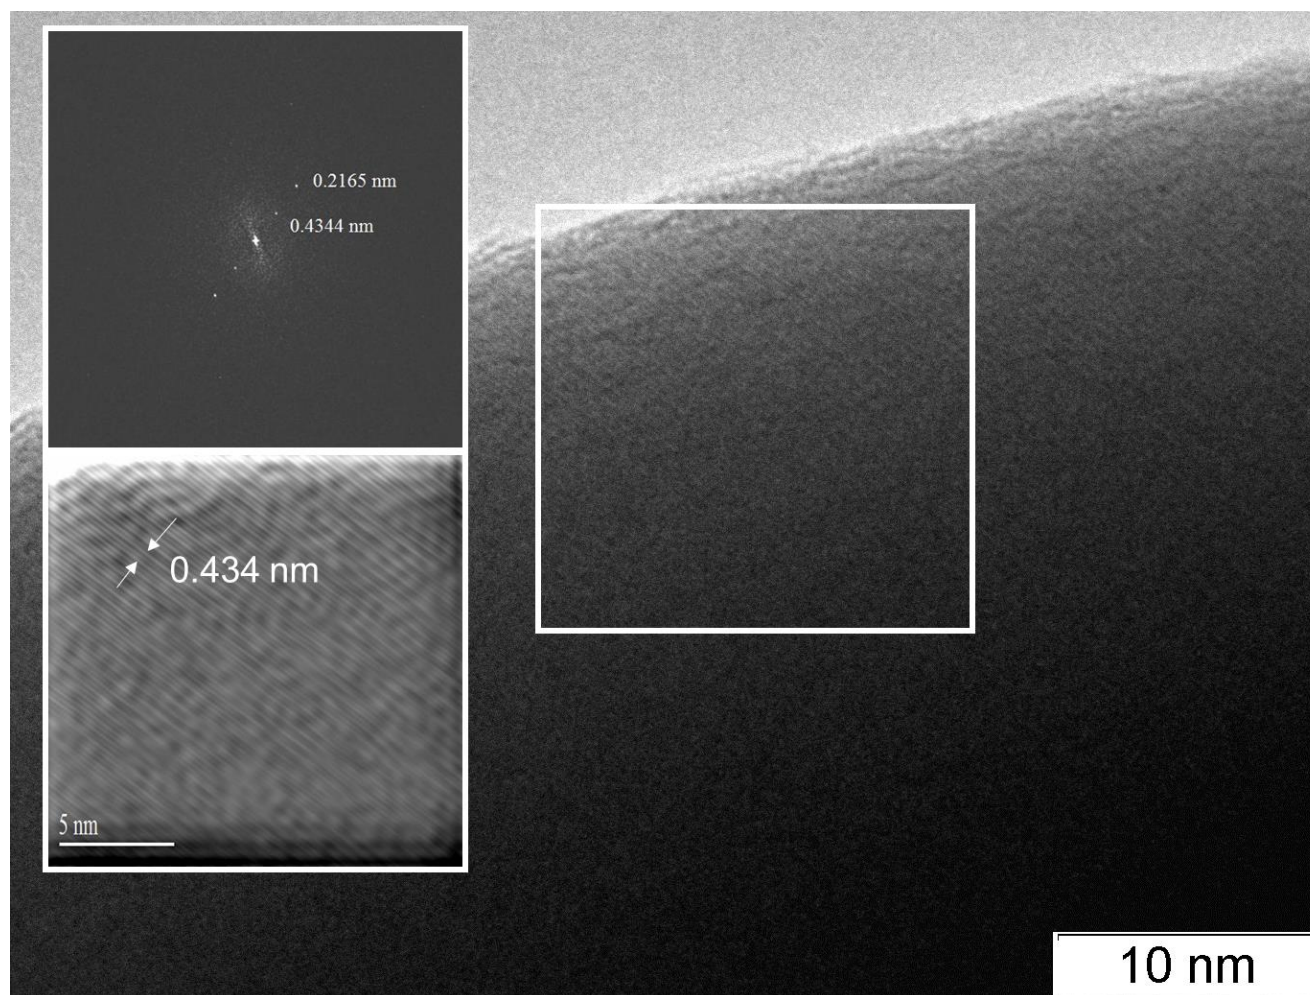

**Figure S2.** Real-resolution HRTEM image supported by FFT diffraction patterns for  $\text{CaV}_{0.5}\text{Mo}_{0.5}\text{O}_{3-\delta}$  sample.

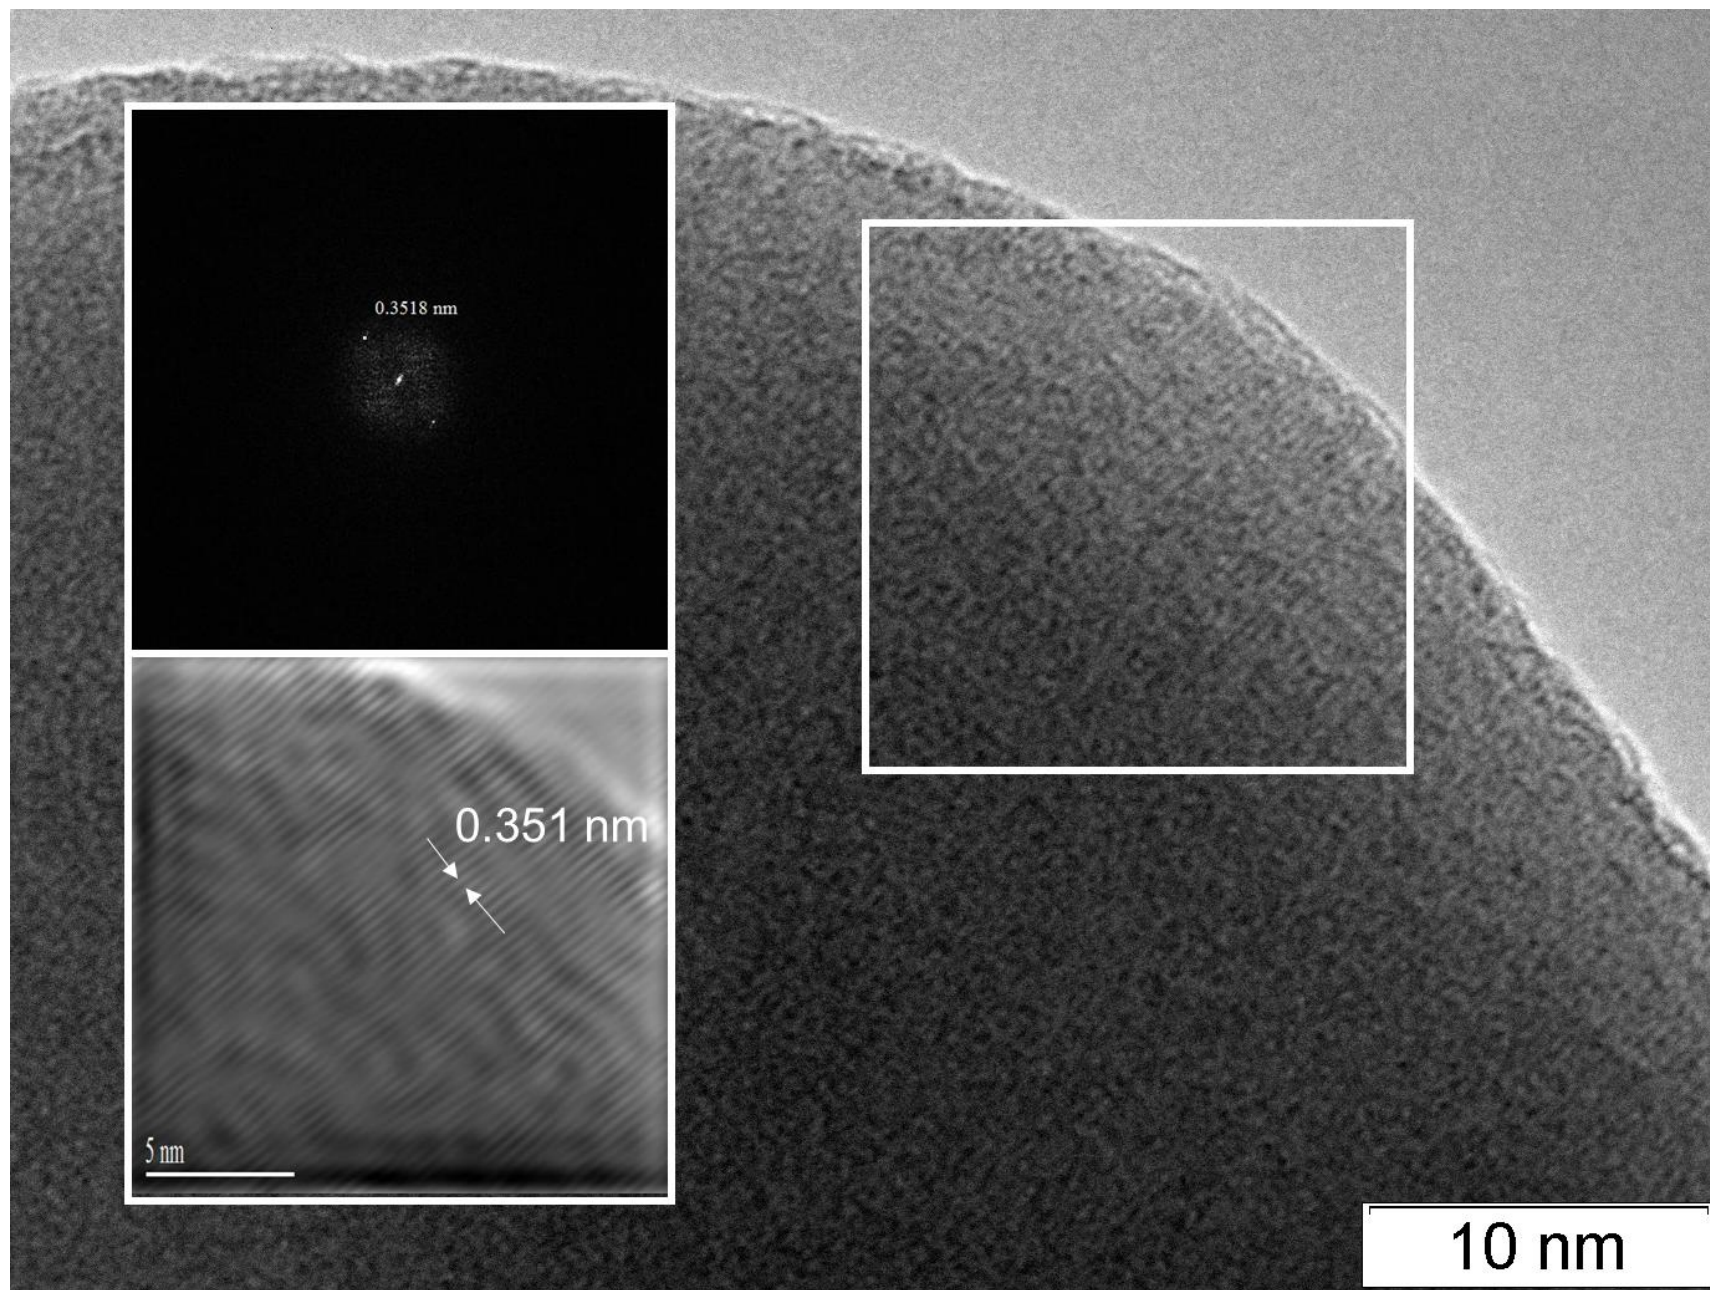

**Figure S3.** Real-resolution HRTEM image supported by FFT diffraction patterns for  $\text{CaV}_{0.6}\text{Mo}_{0.4}\text{O}_{3-\delta}$  sample (region 1).



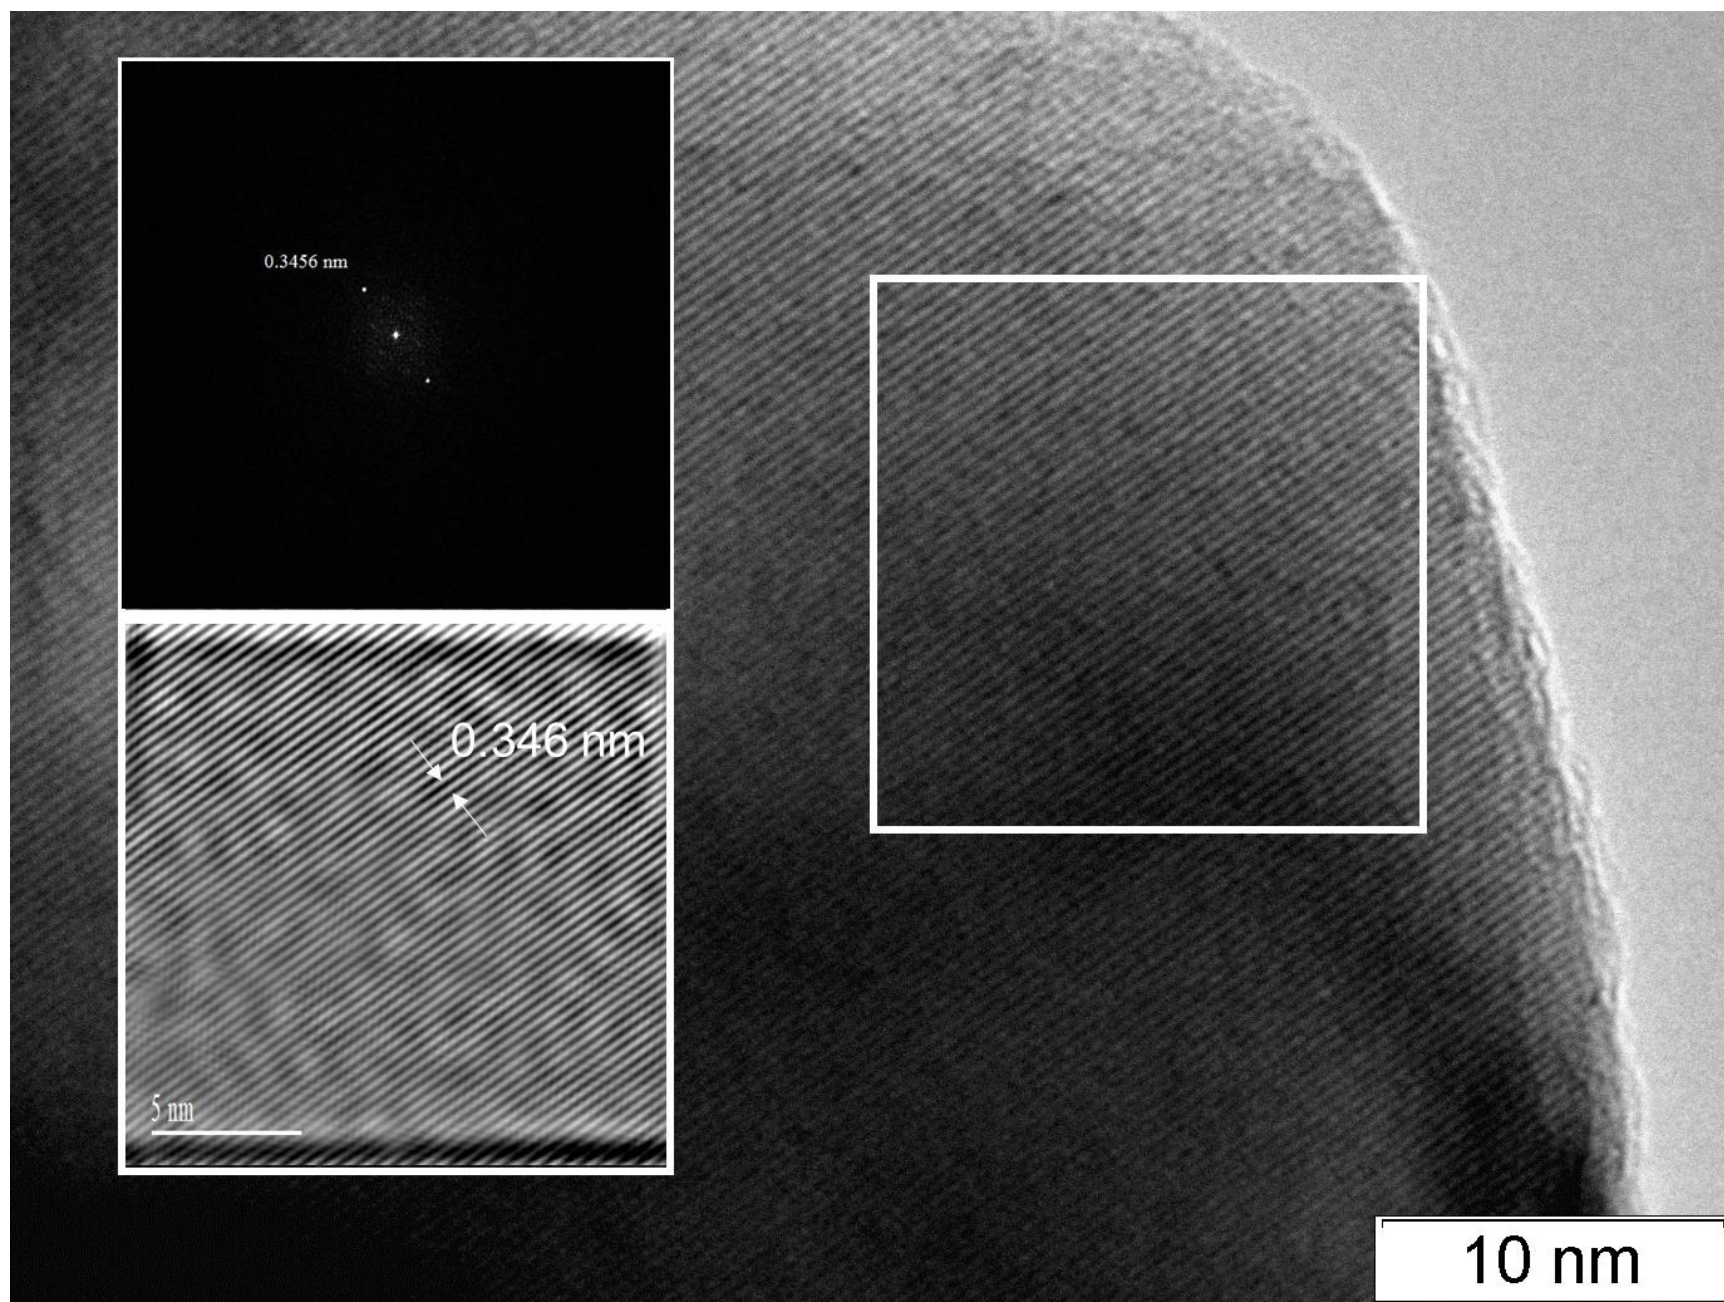

**Figure S4.** Real-resolution HRTEM image supported by FFT diffraction patterns for  $\text{CaV}_{0.6}\text{Mo}_{0.4}\text{O}_{3-\delta}$  sample (region 2).



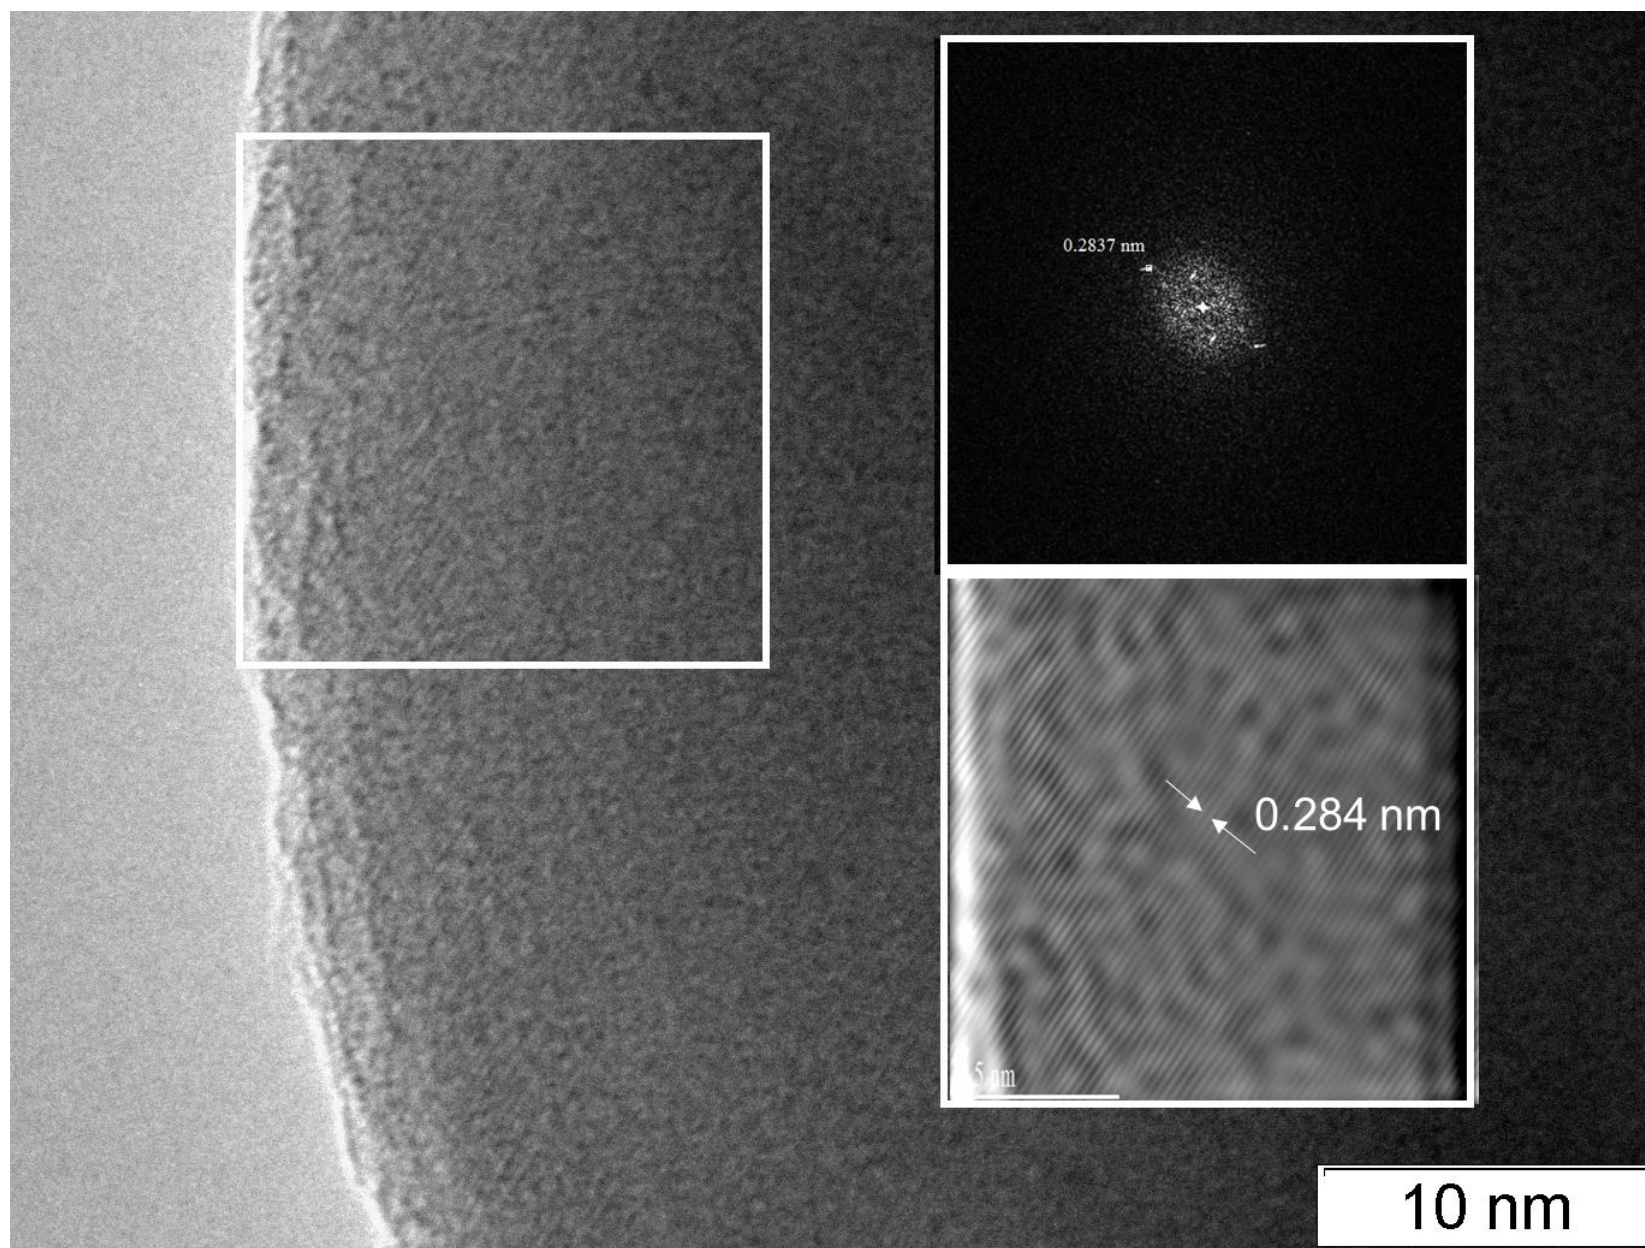

**Figure S5.** Real-resolution HRTEM image supported by FFT diffraction patterns for  $\text{CaV}_{0.6}\text{Mo}_{0.4}\text{O}_{3-\delta}$  sample (region 3).
